# Supplementary material for: Association of Zinc deficiency, oxidative stress and increased double-stranded DNA breaks in globozoospermic infertile patients and its implication for the assisted reproductive technique
Source: PubMed Central journal article supplement — Transl Androl Urol. 2021 Mar;10(3):1088–101. doi: 10.21037/tau-20-1116 (PMC8039599; doi:10.21037/tau-20-1116), 2021-03
Supplement: tau-10-03-1088-dss.pdf [file tau-10-03-1088-dss.pdf]

## Data Sharing Statement

|                     |                                                                                                                                                     |                                                                                                                  |
|---------------------|-----------------------------------------------------------------------------------------------------------------------------------------------------|------------------------------------------------------------------------------------------------------------------|
| <b>Article Info</b> | <a href="http://dx.doi.org/10.21037/tau-20-1116">http://dx.doi.org/10.21037/tau-20-1116</a>                                                         |                                                                                                                  |
| <b>Item</b>         | <b>Question</b>                                                                                                                                     | <b>Authors' Response<br/>(place "-" if not applicable)</b>                                                       |
| 1                   | Would you like to share data collected for your study to others?                                                                                    | yes                                                                                                              |
| 2                   | If not, would you like to share the reason for your decision?                                                                                       | -                                                                                                                |
| 3                   | What data in particular will be shared?                                                                                                             | All data                                                                                                         |
| 4                   | Any other documents will be shared? Such as study protocol, statistical analysis plan, informed consent form, clinical study report, analytic code. | yes                                                                                                              |
| 5                   | When will data availability begin?                                                                                                                  | From the publication date                                                                                        |
| 6                   | When will data availability end?                                                                                                                    | 1 year within the publication date, since the technique may be updated over time.                                |
| 7                   | To whom will you share the data?                                                                                                                    | Medical researchers who may be interested in the data.                                                           |
| 8                   | For what type of analysis or purpose?                                                                                                               | For analysis to evaluate the fertility in globozoospermic patients.                                              |
| c9                  | How or where can the data/documents be obtained?                                                                                                    | From the first authors or corresponding authors by E-mail in the paper.                                          |
| 10                  | Any other restrictions?                                                                                                                             | We may balance the potential benefits and risks for each request and then provide the data that could be shared. |
