# Supplementary material for: Association of Zinc deficiency, oxidative stress and increased double-stranded DNA breaks in globozoospermic infertile patients and its implication for the assisted reproductive technique
Source: PubMed Central journal article supplement — Transl Androl Urol. 2021 Mar;10(3):1088–101. doi: 10.21037/tau-20-1116 (PMC8039599; doi:10.21037/tau-20-1116), 2021-03
Supplement: tau-10-03-1088-supplementary.pdf [file tau-10-03-1088-supplementary.pdf]

**Table S1** DFI results in globozoospermia and normal control with the SCD method

| Groups                  | Sample ID | Number without halo | Total count | DFI (%) | Mean $\pm$ SD (%)  |
|-------------------------|-----------|---------------------|-------------|---------|--------------------|
| Globozoospermia (n=5)   | 1         | 159                 | 252         | 63.09   | 58.30 $\pm$ 4.63** |
|                         | 2         | 121                 | 209         | 57.89   |                    |
|                         | 3         | 122                 | 222         | 54.95   |                    |
|                         | 4         | 106                 | 201         | 52.74   |                    |
|                         | 5         | 147                 | 234         | 62.82   |                    |
| Fertile controls (n=12) | 1         | 79                  | 337         | 23.44   | 23.44 $\pm$ 4.46   |
|                         | 2         | 80                  | 298         | 26.85   |                    |
|                         | 3         | 83                  | 389         | 21.34   |                    |
|                         | 4         | 112                 | 322         | 34.78   |                    |
|                         | 5         | 80                  | 369         | 21.68   |                    |
|                         | 6         | 70                  | 359         | 19.50   |                    |
|                         | 7         | 60                  | 345         | 17.39   |                    |
|                         | 8         | 89                  | 387         | 23.00   |                    |
|                         | 9         | 82                  | 338         | 24.26   |                    |
|                         | 10        | 65                  | 326         | 19.94   |                    |
|                         | 11        | 83                  | 356         | 23.31   |                    |
|                         | 12        | 86                  | 334         | 25.75   |                    |

\*\* , P<0.01 represents very significant differences related to fertile controls. SOD, superoxide dismutase. SOD, superoxide dismutase; DFI, DNA fragmentation index.
